# Supplementary material for: Th2 Cell-Intrinsic Hypo-Responsiveness Determines Susceptibility to Helminth Infection
Source: PubMed Central journal article supplement (PMC3597521; doi:10.1371/journal.ppat.1003215), 2013-03-14
Supplement: ppat.1003215.s001.pdf [file ppat.1003215.s001.pdf]

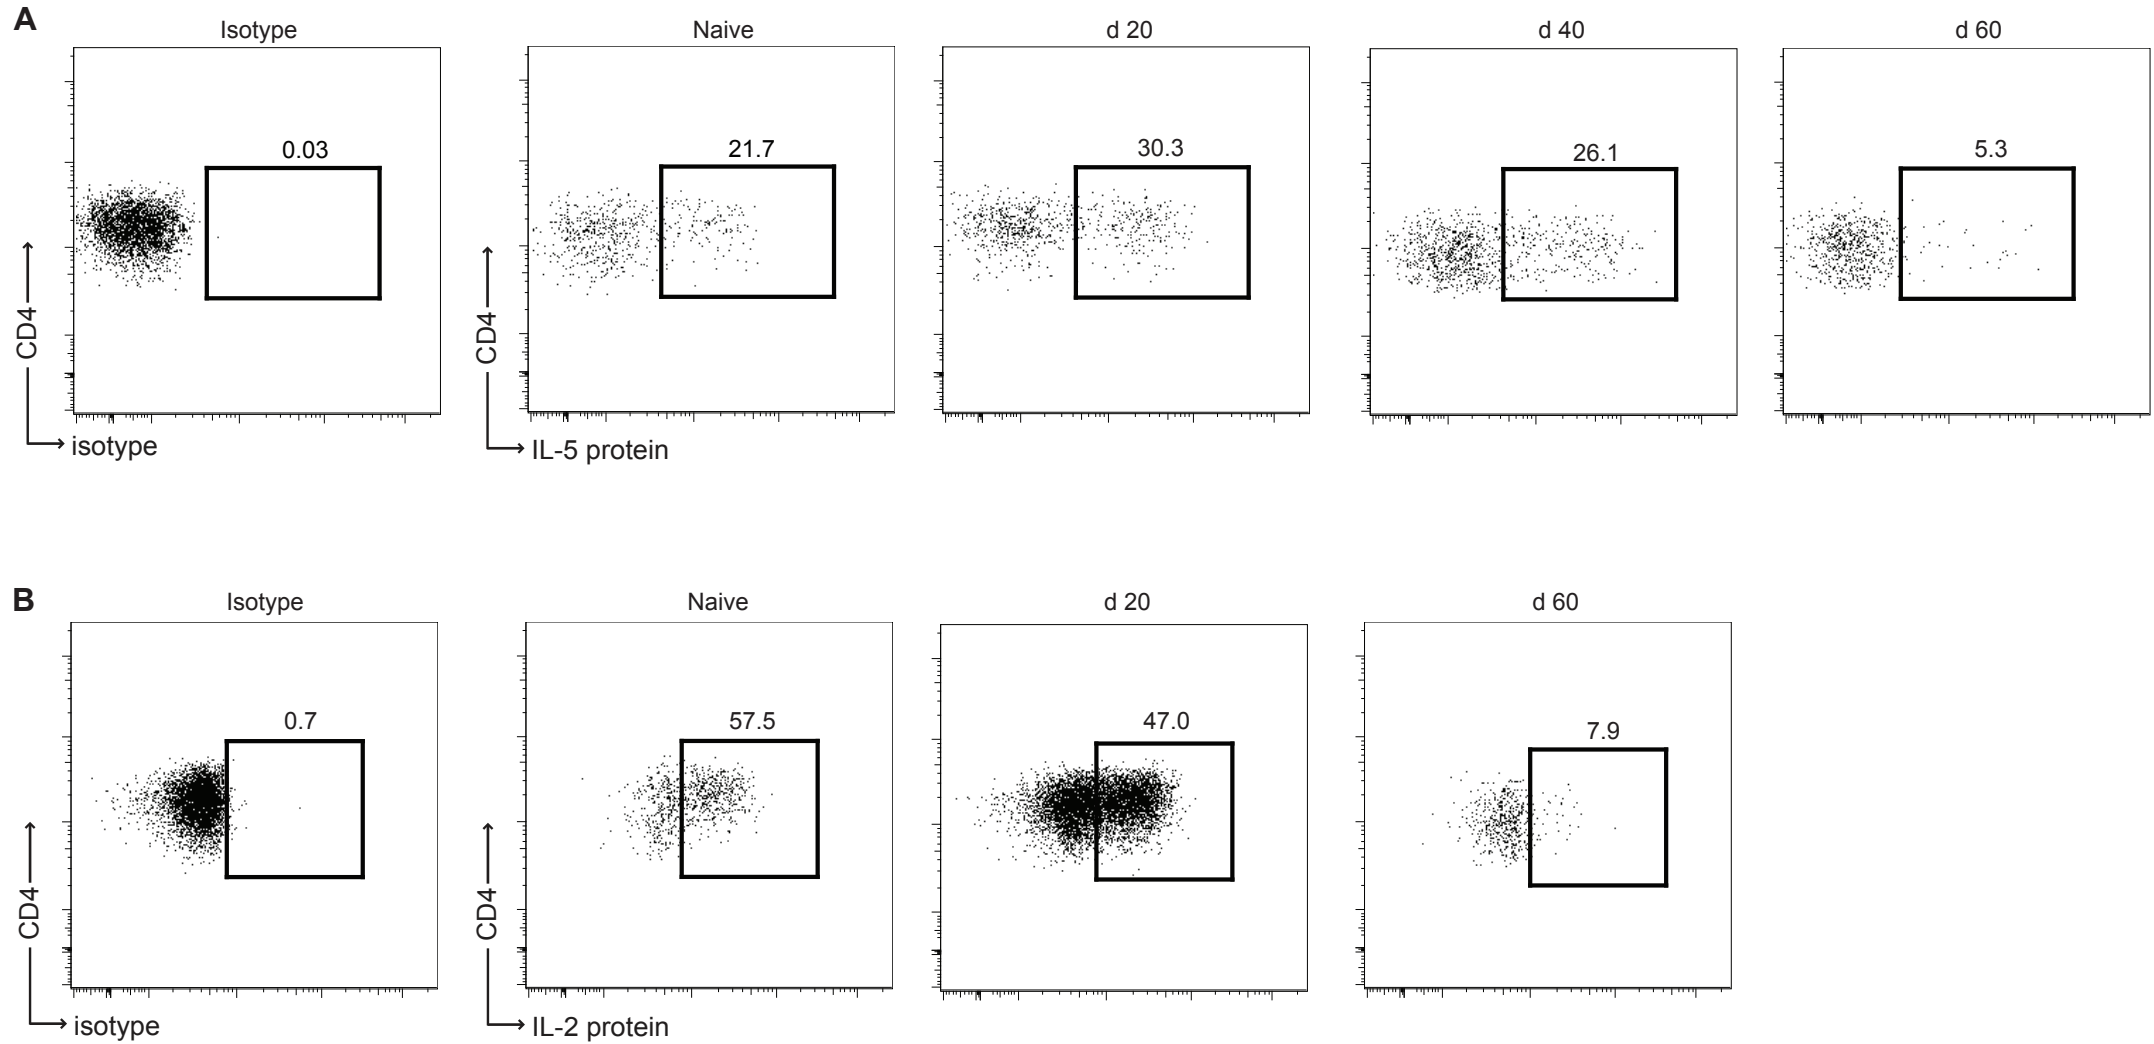

**Figure S1. CD4<sup>+</sup> Th2 cells lose their functional ability to produce IL-5 and IL-2 during *L. sigmodontis* infection.** PC CD4<sup>+</sup> T cells from naive and *L. sigmodontis* infected BALB/c IL-4gfp mice were analysed at d20, d40, and d60 pi for expression of GFP, IL-5 and IL-2. Representative flow plots showing expression of IL-5 (A) and IL-2 (B) by PC IL-4gfp<sup>+</sup> Th2 cells.
